1 **HYD3, a conidial hydrophobin of the fungal entomopathogen *Metarhizium***  
2 ***acridum* induces the immunity of its specialist host locust**

3

4 Zeyuan Jiang<sup>1</sup>, Petros Ligoxygakis<sup>2</sup>, Yuxian Xia<sup>1\*</sup>

5 <sup>1</sup>Genetic Engineering Research Center, School of Life Sciences, Chongqing  
6 University, Chongqing 400045, People's Republic of China. <sup>2</sup>Department of  
7 Biochemistry, South Parks Rd, University of Oxford, Oxford OX1 3QU United  
8 Kingdom

9 \*Corresponding author: yuxianxia@cqu.edu.cn

10 **Abstract:** Conidial hydrophobins in fungal pathogens of plants<sup>1,2</sup>, insects<sup>3,4</sup>, and  
11 humans<sup>5,6</sup> are required for fungal attachment and are associated with high virulence.  
12 They are believed to contribute to the pathogenesis of infection by preventing immune  
13 recognition<sup>5,6</sup>. Here, we refute this generalisation offering a more nuanced analysis.  
14 We show that MacHYD3, a hydrophobin located on the conidial surface of the  
15 specialist entomopathogenic fungus *Metarhizium acridum*, activates specifically the  
16 humoral and cellular immunity of its own host insect, *Locusta migratoria*  
17 *manilensis* (Meyen) but not that of other non-host insects. When topically applied to  
18 the cuticle, purified MacHYD3 improved the resistance of locusts to both specialist  
19 and generalist fungal pathogens but had no effect on the fungal resistance of other  
20 insects, including *Spodoptera frugiperda* and *Galleria mellonella*. Hydrophobins  
21 extracted from the generalist fungal pathogens *M. anisopliae* and *Beauveria*  
22 *bassiana* had no effect on the resistance of locusts to fungal infection. Thus, the host

23 locust has evolved to recognize the conidial hydrophobin of its specialist fungal  
24 pathogen, whereas conidial hydrophobins from generalist fungi are able to evade  
25 recognition. Our results distinguish the immunogenic potential of conidial  
26 hydrophobins between specialist and generalist fungi.

27 **Keywords:** Hydrophobin; *Metarhizium acridum*; innate immunity; *Locusta*  
28 *migratoria manilensis*

29

## 30 **1. Introduction**

31 Fungal pathogens cause serious human, animal, and plant diseases and have numerous  
32 effects on human life<sup>7</sup>. Fungi are responsible for a wide array of superficial and  
33 disseminated (occasionally life-threatening) infections in humans, including *Candida*  
34 *albicans*, *Aspergillus fumigatus*, and *Cryptococcus neoformans*. Most human fungal  
35 pathogens are ubiquitous in the environment and humans are exposed to them by  
36 inhaling their spores<sup>8</sup>. But also in many others contexts fungi are the most ubiquitous  
37 pathogens. For example, they reduce populations of plants and insects, cause many of  
38 the most serious crop diseases<sup>9</sup>, and regulate insect populations in nature<sup>10</sup>. Therefore,  
39 fungi have great potential utility in controlling pest insects and weeds<sup>11</sup>.

40 To combat fungal diseases in agriculture and to develop fungal pesticides,  
41 extensive efforts have been made to clarify the molecular interactions between fungal  
42 pathogens and their hosts. Conidial attachment is the first crucial step in fungal  
43 infection and is modulated by hydrophobins<sup>4,9</sup>. Hydrophobins are small (molecular  
44 mass < 20 kDa), secreted hydrophobic proteins ubiquitously produced by filamentous

45 fungi<sup>4,12,13</sup>. Although very diverse in their amino acid sequences, the hydrophobins  
46 constitute a closely related group of morphogenetic proteins<sup>1</sup>. Fungi can express two  
47 classes of hydrophobin, which play different roles in fungal growth, cell-surface  
48 properties, and development<sup>4</sup>. In the entomopathogenic fungus *Metarhizium*  
49 *brunneum*, *HYD1* and *HYD3* encode class I hydrophobins, and *HYD2* encodes a class  
50 II hydrophobin. Hydrophobins play roles in both fungal pathogenicity and  
51 infection-related development. The deletion of the three hydrophobin genes from the  
52 entomopathogenic fungi *M. brunneum* reduced its virulence<sup>4</sup>. In *Beauveria bassiana*,  
53 the inactivation of *HYD1* reduced spore hydrophobicity and fungal virulence, but  
54 *hyd2* mutants show reduced surface hydrophobicity with no effect on virulence<sup>3</sup>. In  
55 the rice blast fungus *Magnaporthe grisea*, the targeted replacement of *MPG1*, a gene  
56 encoding a fungal hydrophobin, produced mutants with reduced pathogenicity<sup>14</sup>. The  
57 hydrophobin MHP1, has essential roles in surface hydrophobicity and  
58 infection-related fungal development, and is required for the pathogenicity of  
59 *Magnaporthe grisea*<sup>15</sup>. Overall, the hydrophobins of fungal pathogens of plants and  
60 insects have key functions in pathogenicity, involving conidial attachment<sup>3,14</sup>, fungal  
61 germination<sup>3</sup>, the appressorium<sup>4,14</sup>, and host colonization<sup>15</sup>.

62 In addition to regulating infection-related development, hydrophobins can  
63 modulate the immune recognition and phagocytosis of human fungal pathogens. The  
64 conidial cell wall of *A. fumigatus* makes the airborne conidia resistant to the host's  
65 immune response<sup>6</sup>. Mutants with impaired hydrophobins reportedly have a reduced  
66 hydrophobin layer<sup>16</sup>, and a lack of hydrophobins make conidia more susceptible to

67 killing by alveolar macrophages<sup>17</sup>. However, hydrophobin itself cannot activate the  
68 host immune response<sup>6</sup>. Another study showed that the hydrophobins of spores mask  
69 the spores from the dectin-1- and dectin-2-dependent responses and enhances fungal  
70 survival<sup>18</sup>. These findings indicate that the hydrophobins of human pathogenic fungi  
71 prevent conidial recognition by the host immune system. In the interaction between  
72 the specialist pathogenic fungus *M. acridum* and its host insect, the humoral immunity  
73 of the locust responds quickly to the conidia on the fungal cuticle<sup>19</sup>, and the locust can  
74 detect the  $\beta$ -1,3-glucan of the fungal pathogen before its penetration, defending  
75 against infection via the Toll signalling pathway<sup>20</sup>. In addition to Toll, acute phase  
76 reactions in insects include the induction of phenoloxidase cascade, an insect-specific  
77 reaction akin to complement activation of cellular immunity with the rapid  
78 engagement of phagocytes to engulf the invading pathogen<sup>21</sup>. However, the effects of  
79 the hydrophobins of entomopathogenic fungi on the immune response of host insects  
80 have not been investigated. In this study, the effects of conidial hydrophobins of  
81 entomopathogenic fungi on the humoral and cellular immune responses of a host  
82 insect were evaluated, specifically the interaction between the conidial hydrophobin  
83 of *M. acridum* and the immune system of its specialist host *L. migratoria*. A  
84 hydrophobin of the specialist *M. acridum*, MacHYD3, activated specifically the  
85 humoral and cellular immunity of its own host insect, *L. migratoria* but not that of  
86 other insects, and improved the resistance of locusts to both specialist and generalist  
87 fungal pathogens but had no effect on the fungal resistance of other insects. However,  
88 hydrophobins extracted from the generalist fungal pathogens *M. anisopliae* and

89 *Beauveria bassiana* had no effect on the resistance of locusts to fungal infection. The  
90 results showed that HYD3 of the the specialist *M. acridum* specifically induces locust  
91 immunity.

92

## 93 **2. Materials and Methods**

### 94 **2.1 *Locusta migratoria manilensis* (Meyen) and fungal strains**

95 *Locusta migratoria manilensis* (Meyen) is maintained in our laboratory under  
96 crowded conditions, as previously described<sup>22</sup>. Briefly, *L. migratoria* was maintained  
97 at 30 °C and 75% relative humidity with a 12:12 h light:dark photoperiod. The  
98 conidia of *M. anisopliae* var. *acridum* strain CQMa102 used in this study were  
99 provided by the Genetic Engineering Research Centre School of Life Science at  
100 Chongqing University, Chongqing, China, and were cultured as previously  
101 described<sup>23</sup>. Briefly, in a two-phase fermentation process, mycelia were first produced  
102 in a liquid fermentation reactor and then used to inoculate rice autoclaved with  
103 40%–50% water in compound plastic bags (which permitted gas exchange but  
104 prevented microbial contamination). After 15 days, the conidia were harvested, dried,  
105 and used for hydrophobin extraction. For the bioassay, the conidia were cultured on  
106 1/4 Sabouraud dextrose agar with 1% yeast extract (SDAY) for 2 weeks.

### 107 **2.2 Surface hydrophobin extraction and purification**

108 Hydrophobin was extracted from the spore surface as described previously<sup>6</sup>. Briefly,  
109 dry conidia were incubated with 48% hydrofluoric acid for 72 h at 4 °C. The samples  
110 were centrifuged (9,000 × g, 10 min) and the supernatant was dried under N<sub>2</sub>. The

111 dried material was reconstituted in H<sub>2</sub>O. Hydrophobin was purified as previously  
112 described, with some modifications<sup>24</sup>. Briefly, the solution was applied to a column of  
113 highly substituted Phenyl Sepharose® 6 Fast Flow (Pharmacia Biotech, New York,  
114 USA) equilibrated with 100 mM Tris/HCl (pH 7.5) containing 2 M ammonium sulfate.  
115 Most of the hydrophobin was eluted with water after a linear gradient of the  
116 equilibrium buffer to 20 mM Tris/HCl (pH 7.5). The hydrophobin-containing  
117 fractions was further purified with anion exchange fast-performance liquid  
118 chromatography (Q-Sepharose; Pharmacia Biotech) to separate the different forms of  
119 hydrophobin. The proteins were eluted with a linear gradient of 0–0.5 M NaCl in 20  
120 mM Tris/HCl (pH 9.0). The final hydrophobin preparation was concentrated by  
121 ultrafiltration (YM1 membrane; Amicon) and the solvent changed to water with gel  
122 filtration (Biogel P6-DG; Bio-Rad, USA). An aliquot was subjected to SDS-PAGE  
123 (15% gel), visualized with Coomassie Brilliant Blue staining with standard protocols,  
124 and confirmed with mass spectrometry (MS).

### 125 **2.3 *Locusta migratoria* treated topically with hydrophobin, and hemolymph** 126 **collection**

127 Hydrophobin (20 µg) was topically applied to the locusts. The control groups were  
128 treated topically with 20 µg of bovine serum albumin (BSA). The locusts were then  
129 housed in groups of 10 individuals and fed maize leaves. Hemolymph was collected  
130 as described previously<sup>25</sup>. Briefly, Hemolymph was collected from the arthroal  
131 membrane of the hind leg of each locust at 0.5, 1, 2, and 3 h after the topical  
132 application of hydrophobin or BSA. The arthroal membrane of the hind leg of each

133 locust was first swabbed with 70% ethanol, and then pierced with a sterile needle.

134 After all the hemolymph was flushed from each locust, it was collected immediately

135 and mixed with an equal volume of 0.5% sodium citrate to prevent coagulation.

#### 136 **2.4 Total hemocyte counts and phagocyte counts**

137 Hemolymph samples (10  $\mu$ L) were loaded onto a hemocytometer and the total

138 numbers of cells and phagocytes were estimated under a compound microscope at

139 10 $\times$  magnification. A Wright–Giemsa staining assay was used to count the phagocytes

140 as described previously<sup>24</sup>. All experiments were repeated at least three times. The

141 following equation was used to estimate the percentage of phagocytes:

142 percentage phagocytes = (total number of plasmatocytes/total number of hemocytes)

143  $\times 100\%$

#### 144 **2.5 Extracellular phenoloxidase (PO) activity**

145 Twenty fifth-instar nymphs of *L. migratoria* were topically inoculated with 5  $\mu$ L of a

146 paraffin oil suspension of *M. acridum* conidia ( $1 \times 10^8$  conidia/mL) or 20  $\mu$ g of

147 hydrophobin from the spores of *M. acridum* and incubated for 1 h. The blood was

148 then extracted from the locusts. Each blood sample was centrifuged at  $30 \times g$  for 10

149 min at 4  $^{\circ}$ C to remove the blood cells, and the PO activity was measured as described

150 previously, with some modifications<sup>26</sup>. One unit of PO activity was defined as the

151 change in absorbance at a wavelength of 490 nm ( $\Delta A_{490}$ ) after 60 min = 0.001.

#### 152 **2.6 Immune-related gene transcription**

153 Thirty fifth-instar of *L. migratoria* were topically treated with 20  $\mu$ g of hydrophobin,

154 5  $\mu$ L of *M. acridum* conidial suspension ( $1 \times 10^8$  conidia/mL) or 20  $\mu$ g of BSA. The

155 fat bodies were collected after treatment with hydrophobin for 0.5, 1, 2, or 3 h. The  
156 total RNA was extracted with an Ultrapure RNA kit (CWbiotech) and the  
157 complementary DNA (cDNA) was synthesized. Quantitative real-time PCR (qPCR),  
158 and the data analysis were performed as previously described<sup>27</sup>. All the primers used  
159 for qPCR in this study are listed in Supplementary Table 1.

## 160 **2.7 Subcellular localization of MacHYD3**

161 The subcellular location of MacHYD3 in *M. acridum* was determined. Conidia of *M.*  
162 *acridum* were harvested from 1/4 SDAY plates after growth for 15 days at 28 °C. The  
163 conidia were incubated with a primary anti-MacHYD3 antibody overnight at 37 °C,  
164 washed five times with 1 × phosphate-buffered saline (PBS), incubated with a  
165 fluorescein isothiocyanate (FITC)-conjugated goat anti-rabbit IgG secondary antibody  
166 for 4 h at 37 °C, and washed five times with 1 × PBS. The subcellular location of  
167 MacHYD3 was determined as the distribution of green fluorescence, detected with  
168 fluorescence microscopy (Nikon Y-TV55, Tokyo, Japan). The predicted antigenic  
169 sequence at the N-terminus of MacHYD3 (amino acids 73–87:  
170 AIVPFGVKDGTGIRC) was synthesized commercially and used to raise antibodies  
171 in New England white rabbits entrust Cohesion Biosciences (UK). The control group  
172 was vaccinated with preimmune serum instead of the anti-MacHYD3.

## 173 **2.8 Gene synthesis, subcloning, and expression**

174 The complete gene sequence of MacHYD3 was determined, synthesized, and  
175 subcloned into the target vector pET-32a(+) for expression in *Escherichia coli*. The  
176 expected molecular weight of the expressed protein was ~25 kDa. cloning strategy:



177 ATG-Trx-His tag-KpnI-TEV protease site-protein-stop codon-*Hind*III. Competent *E.*  
178 *coli* BL21(DE3) cells stored at  $-80^{\circ}\text{C}$  were thawed on ice. The plasmid DNA (100 ng)  
179 was added to the *E. coli* BL21(DE3) cells and mixed gently. The tube was incubated  
180 on ice for 30 min and then heat shocked at  $42^{\circ}\text{C}$  for  $\sim 90$  s without shaking.  
181 Luria–Bertani (LB) medium (100  $\mu\text{L}$ ) at room temperature was added, and the tube  
182 was incubated with shaking at  $\sim 200$  rpm for 60 min at  $37^{\circ}\text{C}$ . The sample was spread  
183 on an LB agar plate containing 100  $\mu\text{g}/\text{mL}$  ampicillin, and incubated upside down at  
184  $37^{\circ}\text{C}$  overnight. Two single well-isolated colonies were picked and used to inoculate  
185 4 mL of LB broth containing 100  $\mu\text{g}/\text{mL}$  ampicillin. The cells were incubated at  $37^{\circ}\text{C}$   
186 with shaking at 200 rpm. When  $A_{600}$  was 0.6–0.8, isopropyl  
187  $\beta$ -D-1-thiogalactopyranoside (IPTG) was added to one tube at a final concentration of  
188 0.5 mM IPTG to induce protein expression and the cells were incubated at  $37^{\circ}\text{C}$  for 4  
189 h. Another one without IPTG was used as the negative control. Protein expression and  
190 solubility were detected with SDS-PAGE.

## 191 **2.9 Bioassays**

192 Bioassays (topical inoculation and injection) were conducted with fifth-instar nymphs  
193 of *L. migratoria*, as described previously<sup>28</sup>. For the topical inoculation, the  
194 head–thorax junction of each locust was dipped into 5  $\mu\text{L}$  of a paraffin oil suspension  
195 containing  $1 \times 10^7$  conidia/mL or the head–thorax junction of each locust was dipped  
196 into 40  $\mu\text{g}$  of hydrophobin for 1 h and then into 5  $\mu\text{L}$  of a paraffin oil suspension  
197 containing  $1 \times 10^7$  conidia/mL. The control locusts were treated with 5  $\mu\text{L}$  of paraffin  
198 oil only. For the injections, 5  $\mu\text{L}$  of an aqueous suspension containing  $1 \times 10^7$

199 conidia/mL or 5  $\mu$ L of an aqueous suspension containing  $1 \times 10^7$  conidia/mL together  
200 with 20  $\mu$ g of hydrophobin was injected into the hemocoel through the second or third  
201 abdominal segment of each locust. The control locusts were treated with 5  $\mu$ L of  
202 sterile distilled water. Three replicates of each treatment were performed with 30  
203 insects, and the experiment was repeated three times. Second-instar nymphs of *S.*  
204 *frugiperda* were dipped into 0.5  $\mu$ L of a paraffin oil suspension containing  $1 \times 10^8$   
205 conidia/mL on backside or each *S. frugiperda* was dipped into 5  $\mu$ g of hydrophobin  
206 for 1 h and then into 5  $\mu$ L of a paraffin oil suspension containing  $1 \times 10^8$  conidia/mL.  
207 The control were treated with 0.5  $\mu$ L of paraffin oil only. Larvae of *G. mellonella*  
208 were inoculated by immersion in the spore suspension of *M. anisopliae* ( $1 \times 10^8$   
209 conidia/mL) for 20 s or dipped in 5  $\mu$ g of MacHYD3 for 1 h and then inoculated by  
210 immersion in the spore suspension of *M. anisopliae* ( $1 \times 10^8$  conidia/mL) for 20 s.  
211 Mortality was monitored at 12 h intervals.

## 212 **2.10 Nodule counts**

213 To detect the formation of nodules, 5  $\mu$ L of an aqueous suspension containing  $1 \times 10^8$   
214 conidia/mL or 5  $\mu$ L of aqueous suspension containing  $1 \times 10^8$  conidia/mL together  
215 with 20  $\mu$ g of MacHYD3 was injected into the hemocoel of 10 fifth-instar nymphs of  
216 *L. migratoria*. The number of nodules was calculated as previously described, with  
217 some modifications<sup>29</sup>. Briefly, the locusts were collected 12 h after injection. A  
218 mid-dorsal cut was made along the full length of the body. The gut and fat bodies  
219 were removed to expose the inner dorsal surface of the body wall. The nodules were  
220 counted routinely in all abdominal segments under a dissecting microscope. All

221 experiments were repeated three times.

## 222 **2.11 Statistical analysis**

223 All values are expressed as means  $\pm$  standard deviations. Statistical analyses were  
224 performed with the GraphPad Prism 7 software. The data from the survival  
225 experiments were analysed with a log-rank (Mantel–Cox) test. P values  $< 0.05$  were  
226 considered statistically significant. An unpaired *t* test (two-tailed) and one-way  
227 analysis of variance (ANOVA) with a Tukey post hoc test for multiple comparisons  
228 were used to analyse the total hemocyte counts and the gene expression data. All the  
229 figures were generated with the same program.

230

## 231 **3. Results**

### 232 **3.1 Conidia of *M. acridum* activate the cellular and humoral immune responses** 233 **of locusts before germination**

234 Spatial and temporal transcriptomic analyses have shown that the humoral immunity  
235 of the locust responds quickly to the conidia of the specialist pathogen *M. acridum* on  
236 its cuticle<sup>19</sup>. To confirm that *M. acridum* spores activate both the cellular and humoral  
237 immune responses of the locust before their germination, fifth-instar *L. migratoria*  
238 were topically treated with a suspension of *M. acridum* spores. The numbers of  
239 hemocytes and phagocytes, the expression of humoral-immunity-related genes of *L.*  
240 *migratoria* (*Lm*spätzle, *Lm*MyD88, and *Lm*PPO11), and phenoloxidase (PO) activity  
241 were measured. The total number of hemocytes was significantly reduced after  
242 treatment at 1–3 h post-inoculation ( $P = 0.022$ – $0.0002$ ; Fig. 1a, b), and the percentage

243 of phagocytes was significantly higher after treatment than in the control groups at 1 h  
244 post-inoculation ( $P = 0.04$ ; Fig. 1c). Transcription of two Toll pathway signalling  
245 components namely, the extracellular ligand *Lmspätzle* and intracellular  
246 receptor-adaptor complex mediator *LmMyD88*, as well as the pro-phenoloxidase  
247 gene *LmPPO11* was significantly increased at 1, 2, and 3 h post-inoculation ( $P =$   
248 0.0002, 0.0008, and 0.0007, respectively; Fig. 1d). Similarly, PO activity was  
249 significantly higher in the hemolymph of challenged *L. migratoria* than in that of the  
250 control group at 1 h post-inoculation ( $P = 0.0114$ ; Fig 1e). These results demonstrate  
251 that the conidia of *M. acridum* activate the cellular and humoral immune responses of  
252 *L. migratoria* in the very early stage of infection, before germination.

253

### 254 **3.2 The hydrophobin of *M. acridum*, MacHYD3, is located on the conidial surface**

255 Because the conidia of *M. acridum* activate the locust immune response before  
256 germination, and hydrophobin is located in the outermost layer of the conidial  
257 surface<sup>30</sup>, we speculated that the conidial hydrophobin of *M. acridum* plays a role in  
258 activating locust immunity. To test this hypothesis, the hydrophobin of *M. acridum*  
259 was extracted and purified to homogeneity with hydrophobic interaction  
260 chromatography, followed by anion exchange chromatography (Fig. 2a, b). Analysis  
261 of the amino acid sequence of the purified protein with mass spectrometry (MS) (Fig.  
262 2c) showed that it was a hydrophobic protein (Fig. 2d) with eight conserved cysteines  
263 and a signal peptide (Fig. 2c,e). Alignment of the amino acid sequence of the purified  
264 protein with the genomic database of the *M. acridum* strain (CQMa102), other

265 *Metarhizium* spp., and other ascomycetes showed that it was hydrophobin 3  
266 (MacHYD3). The amino acid sequences of the hydrophobins were not conserved  
267 across different fungal species, or even within the same fungal strain (Fig. 2e). The  
268 phylogenetic relationships and classification showed that MacHYD3 is a class I  
269 hydrophobin (Fig. 2f), and a homologue of a previously reported *M. brunneum*  
270 hydrophobin<sup>4</sup>. To confirm the location of MacHYD3 on the conidia, an antibody  
271 directed against MacHYD3 was raised as described in the Materials and Methods. An  
272 immunohistochemical analysis showed that MacHYD3 was located on the surfaces of  
273 *M. acridum* conidia (Fig. 2g). Together, these results demonstrate that MacHYD3 is a  
274 class I hydrophobin located on the surface of the *M. acridum* conidium.

275

### 276 **3.3 Conidial hydrophobin of *M. acridum*, MacHYD3, activates locust immunity** 277 **but conidial hydrophobins from generalist species do not**

278 To test whether MacHYD3 mediates the immunity-based interactions between *M.*  
279 *acridum* and *L. migratoria*, we measured the effects of MacHYD3 purified from  
280 conidial preparations as well as recombinant MacHYD3 (rMacHYD3) on the immune  
281 response of *L. migratoria*. MacHYD3 or rMacHYD3 were topically applied to the  
282 head–thorax junction of *L. migratoria*. To monitor host defence, we measured the  
283 total number of hemocytes, the proportion of phagocytes among the hemocytes, the  
284 PO activity in the hemolymph, and the expression of immune-related genes  
285 (*Lmspätzle*, *LmMyD88*, and *LmPPO11*) in the fat body at 0.5, 1, 2, and 3 h after  
286 application (described in Materials and Methods). Compared with the control group,

287 the total number of *L. migratoria* hemocytes was significantly reduced at 1 h ( $P =$   
288 0.0009; Fig. 3a, b), whereas the proportion of phagocytes ( $P = 0.0144$ ; Fig. 3c) and  
289 PO activity ( $P = 0.0018$ ; Fig. 3d) were significantly elevated at 1 h after the topical  
290 application of MacHYD3. The expression of *Lmspätzle*, *LmMyD88*, and *LmPPO11*  
291 was significantly upregulated at 1 h after the topical application of MacHYD3 ( $P =$   
292 0.0151, 0.0013, and 0.0021, respectively; Fig. 3e). Similarly, rMacHYD3 reduced the  
293 total number of hemocytes at 1 h ( $P = 0.0007$ ; Fig. 3b) and increased PO activity in  
294 the hemolymph ( $P = 0.0049$ ; Fig. 3d). These data suggest that conidial MacHYD3  
295 activates both the cellular and humoral innate immune responses of *L. migratoria*, as  
296 do *M. acridum* conidia in the early stage of infection after conidial attachment.

297 To test whether conidial hydrophobins from generalist fungi activate *L.*  
298 *migratoria* immunity, the hydrophobins of *M. anisopliae* (MaaHYD) and *B. bassiana*  
299 (BbHYD) were extracted. Neither MaaHYD nor BbHYD had a significant effect on  
300 the total number of hemocytes at 0.5, 1, 2 or 3 h after topical application (Fig. S1a) or  
301 PO activity 1 h after topical application (Fig. S1b). These results show that both these  
302 hydrophobins failed to elicit an innate immune response in *L. migratoria*.

303 Together, these data demonstrate that the conidial hydrophobin of the specialist  
304 fungal pathogen *M. acridum*, MacHYD3, activates the cellular and humoral immune  
305 responses of its host locust.

306

307 **3.4 Conidial hydrophobin of *M. acridum*, MacHYD3, improves the resistance of**  
308 ***L. migratoria* but not of other insects, to both specialist and generalist fungi**

309 Since MacHYD3 induces locust immune responses, we tested if it could prime the  
310 insect's immune system and thus improve its resistance to infection by both specialist  
311 and generalist fungi. To estimate the effects of MacHYD3 on the locust's resistance to  
312 pathogenic fungi, bioassays were conducted by injecting MacHYD3 into locusts or  
313 topically loading MacHYD3 onto the head–thorax junction of locusts, and then  
314 inoculating them with 5  $\mu$ L of conidial suspension ( $1 \times 10^7$  conidia/mL) from the  
315 specialist strain *M. acridum* CQMa102. The locusts treated with MacHYD3 died  
316 much more slowly, with a significantly higher median time-to-lethality ( $LT_{50}$ ),  
317 compared to the non-treated controls ( $P = 0.0162$ ; Fig. 4a, 4b). Locusts injected with  
318 MacHYD3 lived as long after inoculation with *M. acridum* CQMa102 conidia as the  
319 uninfected controls (Fig. 4c). Significantly more nodules were observed in the inner  
320 dorsal body walls of the MacHYD3-injected locusts at 12 h after inoculation with *M.*  
321 *acridum* CQMa102 conidia ( $P = 0.0344$ ; Fig. 4d, 4e). To test the effects of MacHYD3  
322 on the locust's resistance to a generalist fungus, locusts were loaded with MacHYD3  
323 at the head–thorax junction and then topically inoculated with 5  $\mu$ L of a conidial  
324 suspension ( $1 \times 10^7$  conidia/mL) of *M. anisopliae* CQMa421. The locusts treated with  
325 MacHYD3 died more slowly, with a  $LT_{50}$  statistically higher, than that of the infected  
326 but not MacHYD3-treated locusts ( $P = 0.0002$ ; Fig. 4f, 4g).

327 These results demonstrate that the hydrophobin MacHYD3 from a specialist  
328 fungal pathogen improved the resistance of its host insect, *L. migratoria*, to both  
329 specialist and generalist fungal pathogens. To test the efficacy of MacHYD3 in  
330 improving the resistance of non-host insects, MacHYD3 were loaded onto *S.*

331 *frugiperda* and *G. mellonella* before they were inoculated with 5  $\mu$ L of conidial  
332 suspension ( $1 \times 10^7$  conidia/mL) of the generalist *M. anisopliae* strain CQMa421.  
333 There was no significant difference in locust survival after treatment with or without  
334 MacHYD3 (Fig. S2a, S2b, S2c and S2d). These data demonstrate that the conidial  
335 hydrophobin of *M. acridum*, MacHYD3 only improves the resistance of its host insect  
336 *L. migratoria* to both specialist and generalist fungi.

337

#### 338 **4. Discussion**

339 As all external physical barriers, the insect cuticle is the first line of defence  
340 against fungal pathogens. In this study, our data demonstrate that the conidia of *M.*  
341 *acridum* activate both the cellular and humoral immune response of the locust before  
342 their germination. This is consistent with recent findings that the humoral immunity  
343 of the locust is activated soon after conidial attachment to the cuticle and during the  
344 germination of the specific pathogen *M. acridum*<sup>19</sup>. Therefore, the host immune  
345 response is activated much earlier during the invasion of the insect epidermis by the  
346 fungus than previously recognized. It had been thought that the lesions in the insect  
347 exoskeleton caused by the invading fungal cells were unlikely to elicit a detectable  
348 humoral immune response before the first layer of live cells in the epidermis had been  
349 breached by the fungus<sup>31,32,33,34</sup>. However, recent findings suggest that components of  
350 the fungal conidial surface elicit cellular and humoral immune responses in the host  
351 insect.  $\beta$ -1,3-Glucan is a component of the conidial surface and a pathogen-associated  
352 molecular pattern (PAMP), It localizes around the germinated conidia and at the



353 germ-tube apex and infiltrates the hemocoel of the locust during the fungal  
354 germination stage, thus activating the Toll signalling pathway of the locust to defend  
355 it against fungal infection<sup>20</sup>. Our results here showed that the total number of  
356 hemocytes was significantly reduced after treatment at 1–3 h post-inoculation. As  
357 seen elsewhere this was due to the fact that hemocytes move and attach to the  
358 basement membranes of the epidermis beneath the host cuticle<sup>35</sup>. Moreover, the  
359 percentage of phagocytes and PO activity were significantly higher after treatment  
360 than in the control groups at 1 h post-inoculation. Taken together, these results  
361 indicate that the humoral and cellular immunity of the host insect responds very  
362 quickly to challenge by the fungal pathogen.

363 Along with  $\beta$ -1,3-Glucan, hydrophobins are also components of the conidial  
364 surface, located in the outermost layer<sup>30</sup>. Conidial hydrophobins play a crucial role in  
365 the attachment of fungal spores to the surface of the host insect<sup>4,16</sup> and in  
366 infection-related development of fungi<sup>3,4,14,15</sup>. Nevertheless, they are considered  
367 “stealth” molecules that prevent induction of immune activity<sup>6</sup>. For example,  
368 *Aspergillus fumigatus* lacking the hydrophobin RodA is more susceptible to killing by  
369 alveolar macrophages<sup>17</sup>, but RodA itself does not activate the host immune system<sup>6</sup>, a  
370 result confirmed in a mouse infection model<sup>36</sup>. Our study confirms that the *M.*  
371 *acridum* hydrophobin MacHYD3 is located on the surface of the conidium.  
372 Unexpectedly however, we found that the conidial hydrophobin of *M. acridum*,  
373 MacHYD3, activates the cellular and humoral immune responses of its specialist host,  
374 the locust *L. migratoria*. In contrast, the conidial hydrophobins of generalist fungi

375 failed to activate the innate immune response of *L. migratoria*. This result suggests  
376 that conidial hydrophobins from generalist fungi *M. anisopliae*, and *B. bassiana*, play  
377 similar roles in conidial masking and fungal immune evasion as the hydrophobin of *A.*  
378 *fumigatus*, RodA. Contradicting the idea that fungal hydrophobins act as a sheath to  
379 prevent the immune recognition of fungal conidia as in the generalist fungal species,  
380 the hydrophobin MacHYD3 from the fungus *M. acridum* activated both the cellular  
381 and humoral immunity of its specialist host. MacHYD3 also significantly improved  
382 the resistance of the host locust to both specialist and generalist fungi by priming its  
383 immune system. However, MacHYD3 failed to improve the resistance of non-host  
384 insects, *S. frugiperda* and *G. mellonella*. These data indicate that a conidial  
385 hydrophobin of the specialist fungal entomopathogen *M. acridum*, HYD3, specifically  
386 activates the cellular and humoral immune responses of its own host, *L. migratoria*.  
387 This specificity may be attributable to differences in the coevolution between  
388 generalist and specialist fungi with their hosts. Generalist fungi are often opportunistic  
389 pathogens, and their hosts may not have had sufficient opportunity to evolve  
390 mechanisms to recognize their conidial hydrophobins. However, during their long  
391 history of coevolution, the host of a specialist fungal species would have evolved an  
392 effective mechanism to recognize the conidial hydrophobins of that species. We  
393 hypothesise that such early detection of pathogens like *M. acridum*, is a prerequisite  
394 for an effective and successful defence as this is a time-sensitive response.

395       The two components of the cell wall of the *M. acridum* spore, hydrophobin (this  
396 study) and  $\beta$ -1,3-glucan (laminarin)<sup>20</sup>, activate the Toll signalling pathway when

397 applied to the cuticle of *L. migratoria*. Because hydrophobin is located in the  
398 outermost layer of the conidium, whereas  $\beta$ -1,3-glucans are exposed when the  
399 conidium is germinating<sup>6</sup>, HYD3 of *M. acridum* should be the earliest immune  
400 inducer, whereas  $\beta$ -1,3-glucan may intensify this response during the germination  
401 stage. In generalist species, hydrophobin may act as a sheath, masking the PAMPs  
402 including  $\beta$ -1,3-glucan on the cell wall of the fungal conidium, to prevent immune  
403 recognition, so the host does not detect the generalist fungal conidium until  
404 germination. Therefore, the evidence presented in this study suggests that MacHYD3  
405 of the specialist fungus *M. acridum* acts as the earliest PAMP for the immune system  
406 of its host *L. migratoria*.

407 An outstanding question concerns the molecular details of MacHYD3 recognition  
408 by the *L. migratoria* immune system as well as the mechanisms by which the  
409 recognition signal is transduced to Toll. Further studies are required to fully clarify  
410 these issues. Studies in *Drosophila* have shown that fungal proteases can act as  
411 “danger signals” to directly trigger the host proteolytic cascade leading to Spaetzle  
412 activation and Toll induction<sup>37</sup>. Whether hydrophobins can do the same or whether  
413 there is a specific *L. migratoria* recognition receptor remains to be identified.  
414 Uncovering the mechanism by which conidial hydrophobins are recognised could  
415 provide new strategies for the development of drugs to counter specialist fungi as well  
416 as the design of more effective fungal-based pesticides.

417

418 **Acknowledgments**

419 **Author Contributions:** Design of the experiments, Y.X. and Z.J.; performance of the  
420 experiments, Z.J.; writing the manuscript, Y.X., P.L. and Z.J. All authors have read the  
421 final manuscript.

422 **Funding:** This research was funded by grants from the National Key R & D Program  
423 of China (Project No. 2017YFD0201208) and the Natural Science Foundation of  
424 China (No. 31540089).

425 **Conflicts of Interest:** The authors declare that they have no conflicts of interest.

426

## 427 **References**

- <sup>1</sup> Kershaw, M. J., Wakley, G. E. & Talbot, N. J. Complementation of the *mpg1* mutant phenotype in *Magnaporthe grisea* reveals functional relationships between fungal hydrophobins. *EMBO J*, **17**(14), 3838–3849 (1998).
- <sup>2</sup> Temple, B., Horgen, P. A. & Bernier, L. Cerato-ulmin, a hydrophobin secreted by the causal agents of Dutch elm disease, is a parasitic fitness factor. *Fungal Genet. Biol.*, **22**(1), 39–53 (1997).
- <sup>3</sup> Zhang, S., Xia, Y. X., Kim, B. & Keyhani, N. O. Two hydrophobins are involved in fungal spore coat rodlet layer assembly and each play distinct roles in surface interactions, development and pathogenesis in the entomopathogenic fungus, *Beauveria bassiana*. *Mol. Microbiol.*, **80**(3), 811–826 (2011).
- <sup>4</sup> Sevim, A., et al. Hydrophobin genes of the entomopathogenic fungus, *Metarhizium brunneum*, are differentially expressed and corresponding mutants are decreased in virulence. *Curr. Genet.*, **58**(2), 79–92 (2012).
- <sup>5</sup> Aïmanianda, V. & Latge, J. Fungal hydrophobins form a sheath preventing immune recognition of airborne conidia. *Virulence*, **1**(3), 185–187 (2010).

- 6 Aimaganianda, V., et al. Surface hydrophobin prevents immune recognition of airborne fungal spores. *Nature*, **460**(7259), 1117–1121 (2009).
- 7 Hyde, K. D., et al. The world's ten most feared fungi. *Fungal Divers.*, **93**(1), 161–194 (2018).
- 8 Brown, G. D., et al. Hidden killers: human fungal infections. *Sci. Transl. Med.*, **4**(165), (2012).
- 9 Tucker, S. L. & Talbot, N. J. Surface attachment and pre-penetration stage development by plant pathogenic fungi. *Annu. Rev. Phytopathol.*, **39**(1), 385–417 (2001).
- 10 Meyling, N. V. & Hajek, A. E. Principles from community and metapopulation ecology: application to fungal entomopathogens. *Biocontrol.*, **55**(1), 39–54 (2010).
- 11 Hyde, K. D., Xu, J. & Rapior, S. The amazing potential of fungi: 50 ways we can exploit fungi industrially. *Fungal Divers.*, **97**(1), 1–136 (2019).
- 12 Wosten, H. A. Hydrophobins: multipurpose proteins. *Annu. Rev. Microbiol.*, **55**(1), 625–646 (2001).
- 13 Wessels, J. G. Developmental regulation of fungal cell wall formation. *Annu. Rev. Phytopathol.*, **32**(1), 413–437 (1994).
- 14 Talbot, N. J., Ebbole, D. J., & Hamer, J. E. Identification and characterization of MPG1, a gene involved in pathogenicity from the rice blast fungus *Magnaporthe grisea*. *Plant Cell*. **5**(11), 1575–1590 (1993).
- 15 Kim, S., Ahn, I. P., Rho, H. S., Lee, Y. H. MHP1, a *Magnaporthe grisea* hydrophobin gene, is required for fungal development and plant colonization. *Mol. Microbiol.*, **57**(5), 1224–1237 (2005).
- 16 Dagenais, T. R., et al. *Aspergillus fumigatus* LaeA-mediated phagocytosis is associated with a decreased hydrophobin layer. *Infect. Immun.*, **78**(2), 823–829

- (2010).
- <sup>17</sup> Paris, S., et al., Condial Hydrophobins of *Aspergillus fumigatus*. *Appl. Environ. Microbiol.*, **69**(3), 1581–1588 (2003).
  - <sup>18</sup> de Jesus Carrion, S., Leal, S. M., Ghannoum, M. A., Pearlman, E. The rodA hydrophobin on *Aspergillus fumigatus* spores masks dectin-1–and dectin-2–dependent responses and enhances fungal survival in vivo. *J. Immunol.*, **191**(5), 2581–2588 (2013).
  - <sup>19</sup> Zhang, W., et al. Spatial and temporal transcriptomic analyses reveal locust initiation of immune responses to *Metarhizium acridum* at the pre-penetration stage. *Deve. Comp. Immunol.*, **104**, 103524 (2020).
  - <sup>20</sup> Zheng, X., Li, S., Si, Y., Hu, J. & Xia, Y. Locust can detect  $\beta$ -1, 3-glucan of the fungal pathogen before penetration and defend infection via the Toll signaling pathway. *Dev. Comp. Immunol.*, **106**, 103636 (2020).
  - <sup>21</sup> Kounatidis, I. and Ligoxygakis, P. Drosophila as a model system to unravel the layers of innate immunity to infection. *Open Biol.*, **2**(5), 120075 (2020).
  - <sup>22</sup> He, Z., et al. Role of hunchback in segment patterning of *Locusta migratoria manilensis* revealed by parental RNAi. *Dev. Growth Differ.*, **48**(7), 439–445 (2006).
  - <sup>23</sup> Peng, G., Wang, Z., Yin, Y., Zeng, D. & Xia, Y. Field trials of *Metarhizium anisopliae* var. *acridum* (Ascomycota: Hypocreales) against oriental migratory locusts, *Locusta migratoria manilensis* (Meyen) in Northern China. *Crop Protect.*, **27**(9), 1244–1250 (2008).
  - <sup>24</sup> Askolin, S., Nakari-Setälä, T. & Tenkanen, M. Overproduction, purification, and characterization of the *Trichoderma reesei* hydrophobin HFBI. *Appl. Microbiol. Biotechnol.*, **57**, 124–130 (2001).

- <sup>25</sup> Yu, Y., Cao, Y., Xia, Y. & Liu, F. Wright-Giemsa staining to observe phagocytes in *Locusta migratoria* infected with *Metarhizium acridum*. *J. Invertebr. Pathol.*, **139**, 19-24 (2016).
- <sup>26</sup> Beck, M. H. & Strand, M. R. A novel polydnavirus protein inhibits the insect prophenoloxidase activation pathway. *Proc. Natl. Acad. Sci.*, **104**(49), 19267–19272 (2007).
- <sup>27</sup> Castillo, J. C., Shokal, U. & Eleftherianos, I. Immune gene transcription in *Drosophila* adult flies infected by entomopathogenic *nematodes* and their mutualistic bacteria. *J. Insect. Physiol.*, **59**(2), 179–185 (2013).
- <sup>28</sup> Jin, K., Ming, Y. & Xia, Y. MaHog1, a Hog1-type mitogen-activated protein kinase gene, contributes to stress tolerance and virulence of the entomopathogenic fungus *Metarhizium acridum*. *Microbiology* **158**(12), 2987–2996 (2012).
- <sup>29</sup> Goldsworthy, G., Chandrakant, S. & Opoku-Ware, K. Adipokinetic hormone enhances nodule formation and phenoloxidase activation in adult locusts injected with bacterial lipopolysaccharide. *J. Insect. Physiol.*, **49**(8), 795–803 (2003).
- <sup>30</sup> Latgé, J. P. Tasting the fungal cell wall. *Cell. Microbiol.*, **12**(7), 863–872 (2010).
- <sup>31</sup> Fehlbauer, P., et al. Insect immunity. Septic injury of *Drosophila* induces the synthesis of a potent antifungal peptide with sequence homology to plant antifungal peptides. *J. Biol. Chem.*, **269**(52), 33159–33163 (1994).
- <sup>32</sup> Gillespie, J. P., Burnett, C. & Charnley, A. K. The immune response of the *desert locust* *Schistocerca gregaria* during mycosis of the entomopathogenic fungus, *Metarhizium anisopliae* var *acridum*. *J. Insect Physiol.*, **46**(4), 429–437 (2000).
- <sup>33</sup> Kylsten, P., Samakovlis, C. & Hultmark, D. The cecropin locus in *Drosophila*; a compact gene cluster involved in the response to infection. *EMBO J.*, **9**(1), 217–224 (1990).

- <sup>34</sup> Wicker, C., et al. Insect immunity. Characterization of a *Drosophila* cDNA encoding a novel member of the dipterecin family of immune peptides. *J. Biol. Chem.*, **265**(36), 22493–22498 (1990).
- <sup>35</sup> Gunnarsson, S. G. S. Infection of *Schistocerca gregaria* by the fungus *Metarhizium anisopliae*: Cellular reactions in the integument studied by scanning electron and light microscopy. *J. Invertebr. Pathol.*, **52** (1), 9-17 (1988).
- <sup>36</sup> Perkhofer, S., et al. Human platelets attenuate *Aspergillus* species via granule-dependent mechanisms. *J. Infect. Dis.*, **198**(8), 1243–1246 (2008).
- <sup>37</sup> Issa, N., Guillaumont, N., Lauret, E., Matt, N., Schaeffer-Reiss, C. et al. The circulating protease Persephone is an immune sensor for microbial proteolytic activities upstream of the *Drosophila* Toll pathway. *Mol Cell.*, **69**(4), 539-550 (2018).



**Figure 1. *Metarhizium acridum* activates the immune response of *Locusta migratoria*.** (a) Representative images of *L. migratoria* hemocytes after topical application of 5  $\mu$ l of spore suspension of *M. acridum* ( $1 \times 10^8$  conidia/ml) relative to the control. Scale bar = 20  $\mu$ m. Arrows indicate hemocytes. (b) Total hemocytes counts of *L. migratoria* 0.5, 1, 2, or 3 h after topical application of 5  $\mu$ l of spore suspension of *M. acridum* ( $1 \times 10^8$  conidia/ml). (c) Hemocytes engaged in phagocytosis 1 h after topical application of 5  $\mu$ l of spore suspension of *M. acridum* ( $1 \times 10^8$  conidia/ml). (d) Immunity-related gene expression in fat bodies of *L. migratoria* 0.5, 1, 2, or 3 h after topical application of 5  $\mu$ l of spore suspension of *M. acridum* ( $1 \times 10^8$  conidia/ml), n = 30 per group. (e) Phenoloxidase (PO) activity of *L. migratoria* 1 h after topical application of 5  $\mu$ l of spore suspension of *M. acridum* ( $1 \times 10^8$  conidia/ml). One unit of PO activity was defined as  $\Delta A_{490} = 0.001$  after 60 min, n=10 for each group except (d). Control groups were treated with topical applications of 5  $\mu$ l of paraffin oil (a–e). n.s.  $P > 0.05$ , \* $P < 0.05$ , \*\* $P < 0.01$ , \*\*\* $P < 0.001$ . Error bars represent standard deviations of the means.

**Figure 2. Analysis of hydrophobin MacDYD3, extracted from *Metarhizium acridum*.** HPLC chromatograms of primary extracted hydrophobin. Hydrophobin after hydrophobic interaction chromatography (a) and anion exchange chromatography (b). (c) Sequence of hydrophobin from *M. acridum*. (Signal peptide (in blue), eight conserved cysteines (in red). (Signal peptide

prediction–<http://www.cbs.dtu.dk/services/SignalP/>). **(d)** ProtScale of hydrophobin (<https://web.expasy.org/protscale/>). **(e)** Alignment of the hydrophobin sequences from *M. acridum* genomes. Asterisk (\*), denotes identity. **(f)** Phylogenetic relationships of MacHYD3 (black triangles) with hydrophobins from *M. acridum* strain CQMa102 and other *Metarhizium* spp. or other ascomycetes. The neighbor-joining model was constructed with the MEGA 5 software. The robustness of the generated tree was determined with 1,000 bootstrap replicates. The fungal proteins used were: *M. acridum* MacHYD1 (XP\_007813670); *M. acridum* MacHYD2 (XP\_007810716); *M. acridum* MacHYD3(XP\_007809299); *M. acridum* MacHYD4 (XP\_007811435); *M. acridum* MacHYD5 (XP\_007815847); *M. anisopliae* Hyd2 (ADP37438); *Beauveria bassiana* Hyd1 (XP\_008599918); *Botrytis cinerea* Bhp1 (BC1G\_15273); *B. cinerea* Bhp3 (BC1G\_01012); *Trichoderma harzianum* Hyd7 (AWT58102); *Trichoderma harzianum* Hyd1 (ANU06237); *B. bassiana* Hyd1 (XP\_008599918); *Verticillium dahliae* VDH1 (AAV89101.1); *Magnaporthe grisea* MPG1 (P52751); *M. grisea* MHP1 (AAD18059); *Fusarium culmorum* FcHyd5p (ABE27986.1); *Neurospora crassa* EAS (EAA34064.1); *Claviceps purpurea* CPPH1(CAD10781.1); *Aspergillus nidulans* RodA (AAA33321.1); *A. flavus* RodB (XP\_002375446); *A. nidulans* DewA (AAC13762.1); *A. fumigatus* RodA (AAB60712.1), and *A. fumigatus* RodB (EAL91055.1). The corresponding accession numbers were obtained from the NCBI database (<http://www.ncbi.nlm.nih.gov/>). **(g)** Subcellular localization of MacHYD3. **Above**, Localization of MacHYD3 with pre-immune serum and a FITC-conjugated goat anti-rabbit IgG secondary antibody. **Below**, Localization of MacHYD3 with

anti-MacHYD3 primary antibody and a FITC-conjugated goat anti-rabbit IgG secondary antibody. BF, bright field; GF, green fluorescence. Scale bar = 5  $\mu$ m.

**Figure 3. Hydrophobin of *Metarhizium acridum* activates the innate immune response of *Locusta migratoria*.** (a) Total hemocyte preparation of *L. migratoria* after topical application of 20  $\mu$ g of hydrophobin of *M. acridum* (MacHYD3). Scale bar = 20  $\mu$ m. Arrows indicate hemocytes. (b) Total hemocyte counts of *L. migratoria* 0.5, 1, 2, or 3 h after topical application of 20  $\mu$ g of hydrophobin of *M. acridum* (MacHYD3) or rMacHYD3 to the head–thorax junction. (c) Plasmatocytes of *L. migratoria* 1 h after topical application of 20  $\mu$ g of MacHYD3 to the head–thorax junction. (d) Phenoloxidase (PO) activity of *L. migratoria* 1 h after topical application of 20  $\mu$ g of MacHYD3 or rMacHYD3 to the head–thorax junction. One unit of PO activity was defined as  $\Delta_{A490} = 0.001$  after 60 min. (e) Immunity-related gene expression in fat body of *L. migratoria* 0.5, 1, 2, or 3 h after topical application of 20  $\mu$ g of MacHYD3 to the head–thorax junction, n = 30 per group. Control groups were treated with topical application of 20  $\mu$ g of bovine serum albumin (BSA), n = 10 per group, except (e). n.s.  $P > 0.05$ , \* $P < 0.05$ , \*\* $P < 0.01$ , \*\*\* $P < 0.001$ . Error bars represent standard deviations of the means.

**Figure 4. MacHYD3 primes the locust’s immune system for better survival after infection.** (a) *Locusta migratoria* after topical application of 5  $\mu$ l of conidial

suspension of *Metarhizium acridum* ( $1 \times 10^7$  conidia/ml) or/and 1 h after 40  $\mu$ g of MacHYD3 was topical application. Control groups were treated with topical application of 5  $\mu$ l of paraffin oil. **(b)** The median 50% lethality time (LT<sub>50</sub>) of *L. migratoria* after topical application of *M. acridum* or /and MacHYD3. **(c)** *Locusta migratoria* injected with 5  $\mu$ l of conidial suspension of *M. acridum* ( $1 \times 10^7$  conidia/ml) or/and 20  $\mu$ g of MacHYD3. Control groups were injected with 5  $\mu$ l of sterile distilled water. Experiments were performed in triplicate. **(d)** Number of nodules on insect dorsal inner body walls 12 h after injection,  $**P < 0.01$ ,  $n = 10$ . **(e)** Nodule formation in insect dorsal inner body walls at 12 h after injection. Arrows indicate typical nodules. Scale bar = 1 mm. **(f)** *Locusta migratoria* after topical application of 5  $\mu$ l of conidial suspension of *M. anisopliae* ( $1 \times 10^7$  conidia/ml), 40  $\mu$ g MacHYD3 (MacHYD3), 5  $\mu$ l  $1 \times 10^7$  conidia/mL conidial suspension of *M. anisopliae* was topical application 1 h after 40  $\mu$ g MacHYD3 was topical application or 5  $\mu$ L of paraffin oil (Control). **(g)** The median 50% lethality time (LT<sub>50</sub>) of *L. migratoria* after topical application of *M. anisopliae* or *M. anisopliae* + MacHYD3. Data were analyzed with a log-rank test **(a,c,f)**.  $****P < 0.0001$ . Error bars represent standard deviations,  $*P < 0.05$ .  $***P < 0.001$  **(b,d,g)**.

**Supplementary Figure 1. Hydrophobin from conidia of *Metarhizium anisopliae* (MaaHYD) and *Beauveria bassiana* (BbHYD) does not activate the innate immunity of *Locusta migratoria*. (a)** Total number of hemocytes of *L. migratoria* 0.5, 1, 2, or 3 h after topical application of 20  $\mu$ g of MaaHYD or BbHYD. **(b)**

Phenoloxidase (PO) activity of *L. migratoria* 1 h after topical application of 20 µg of MaaHYD or BbHYD. One unit of PO activity was defined as  $\Delta A_{490} = 0.001$  after 60 min. Data are representative of at least two independent experiments, each with similar results. n.s.,  $P > 0.05$ . Error bars represent standard deviations of the means.

**Supplementary Figure 2. Survival after infection of non-host insects. (a)**

*Spodoptera frugiperda* after topical application of 0.5 µl of conidial suspension of *M. anisopliae* ( $1 \times 10^8$  conidia/ml), 5 µg MachYD3 (MachYD3), 0.5 µl spore/mL conidial suspension of *M. anisopliae* ( $1 \times 10^8$  conidia/ml) was topical application 1 h after 5 µg MachYD3 was topical application (MachYD3+*M. anisopliae*), or 0.5 µl of paraffin oil (Control). **(b)**  $LT_{50}$  for *S. frugiperda* after topical application assay. **(c)** *Galleria mellonella* larvae were inoculated by immersion in the spore suspension for 20 s ( $1 \times 10^7$  conidia/ml, *M. anisopliae*), larvae were immersed in spore suspension for 20 s ( $1 \times 10^7$  conidia/ml, *M. anisopliae*) 1 h after 5 µg MachYD3 was topical application (MachYD3+*M. anisopliae*); larvae were immersed in sterile water (Control); or 5 µg MachYD3 was topical application on backs of larvae (MachYD3). **(d)**  $LT_{50}$  for *G. mellonella* larvae inoculated in the immersion assay. Data were analyzed with a log-rank test **(a,c)**, n.s.,  $P > 0.05$ . Error bars represent standard deviations **(b,d)**, n.s.,  $P > 0.05$ .

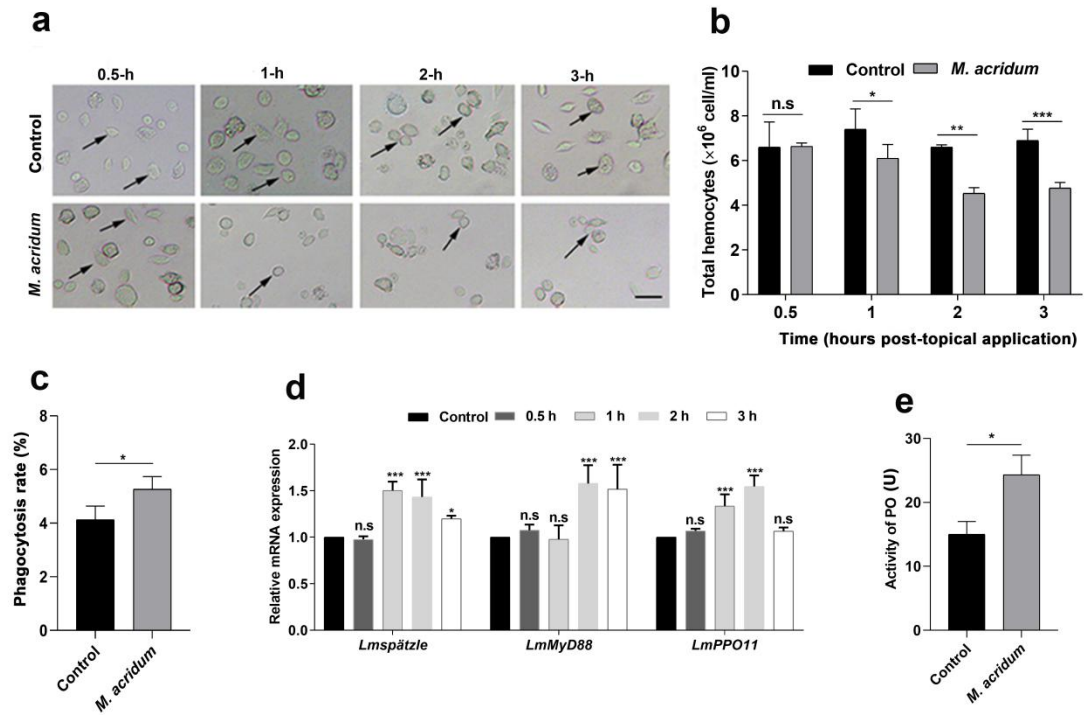

**Figure 1.**

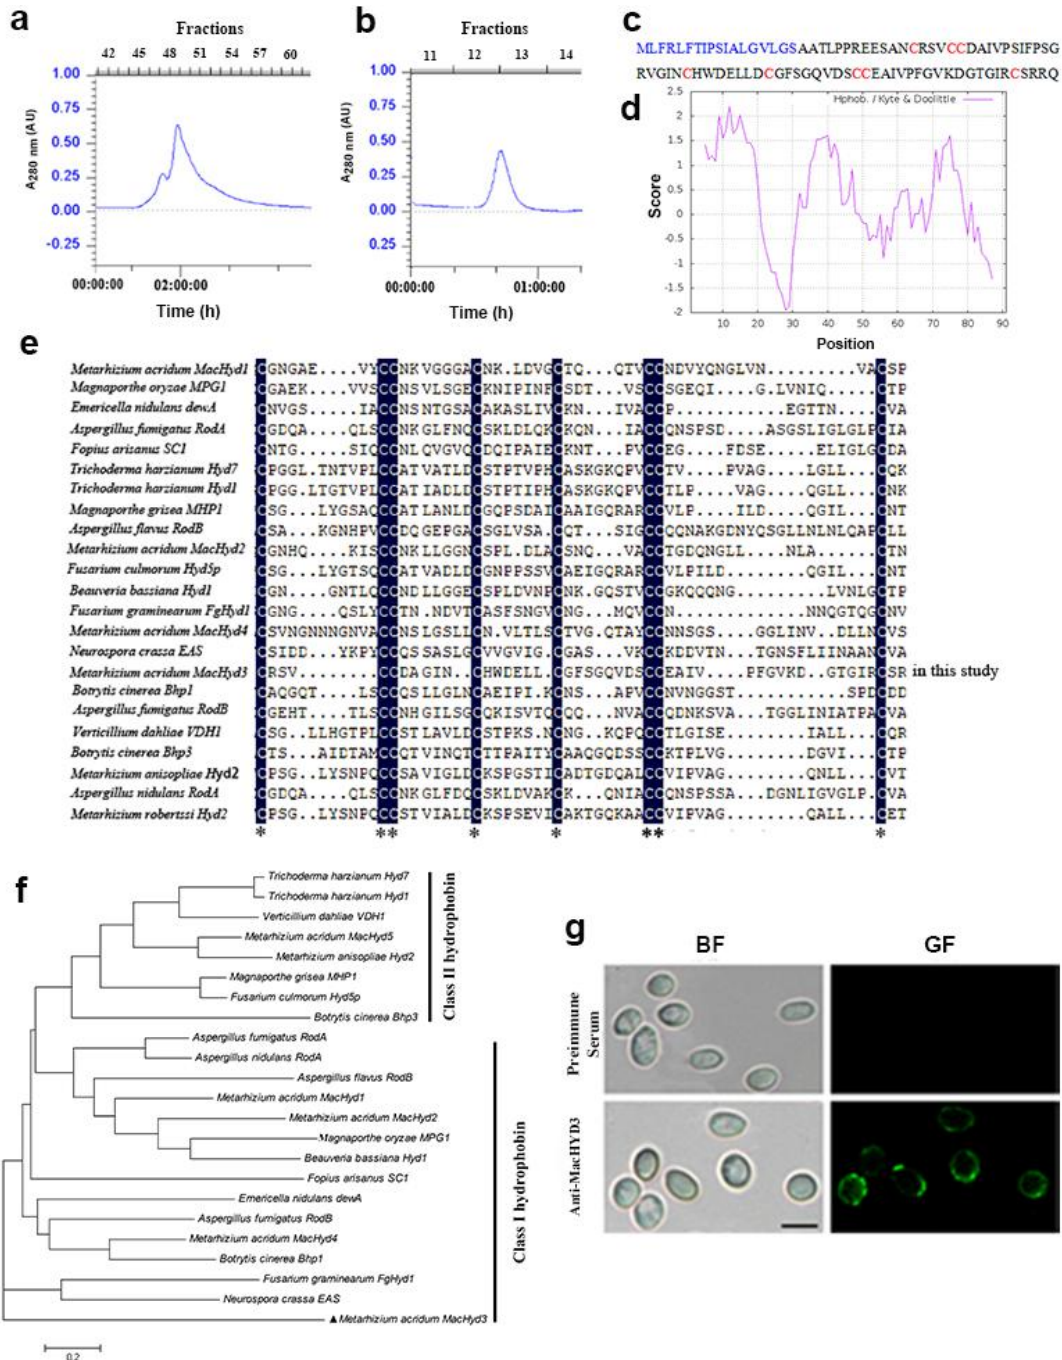

Figure 2.

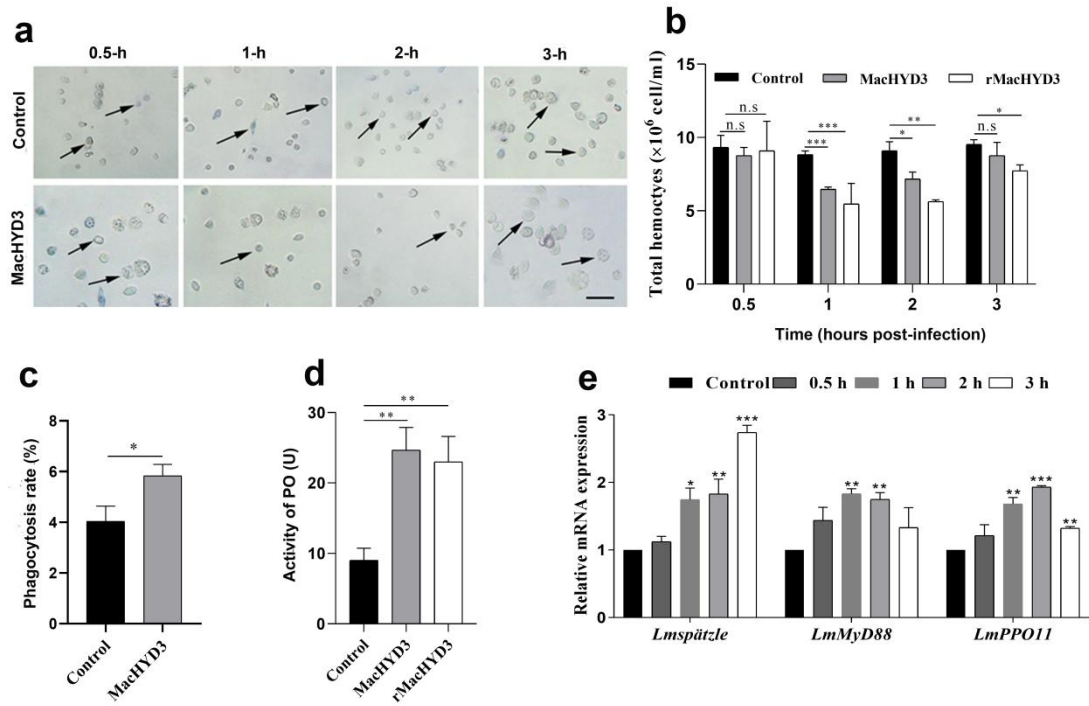

**Figure 3.**



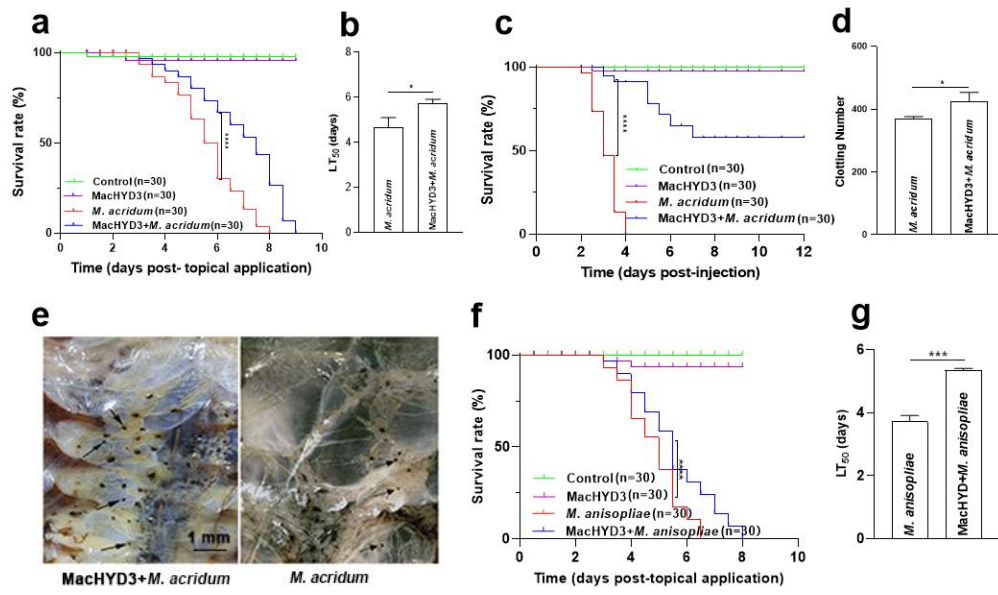

Figure 4.

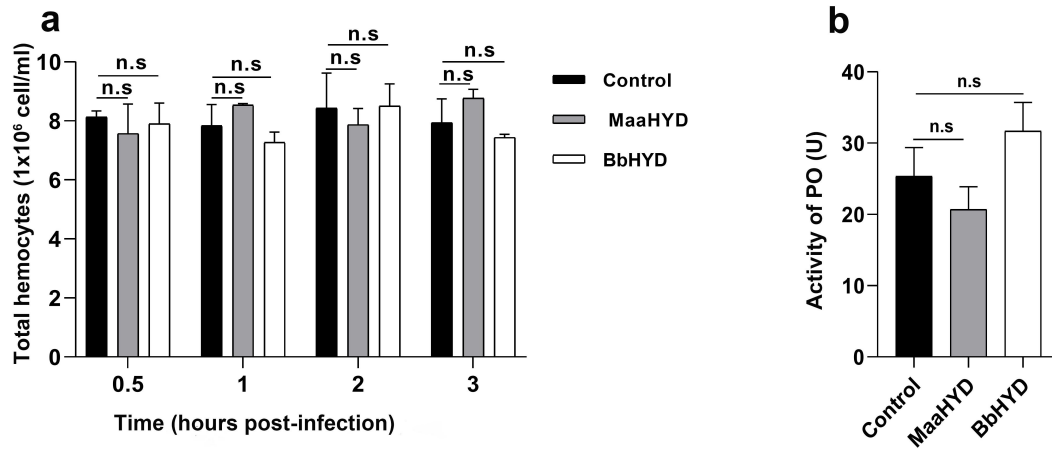

Supplementary Figure 1

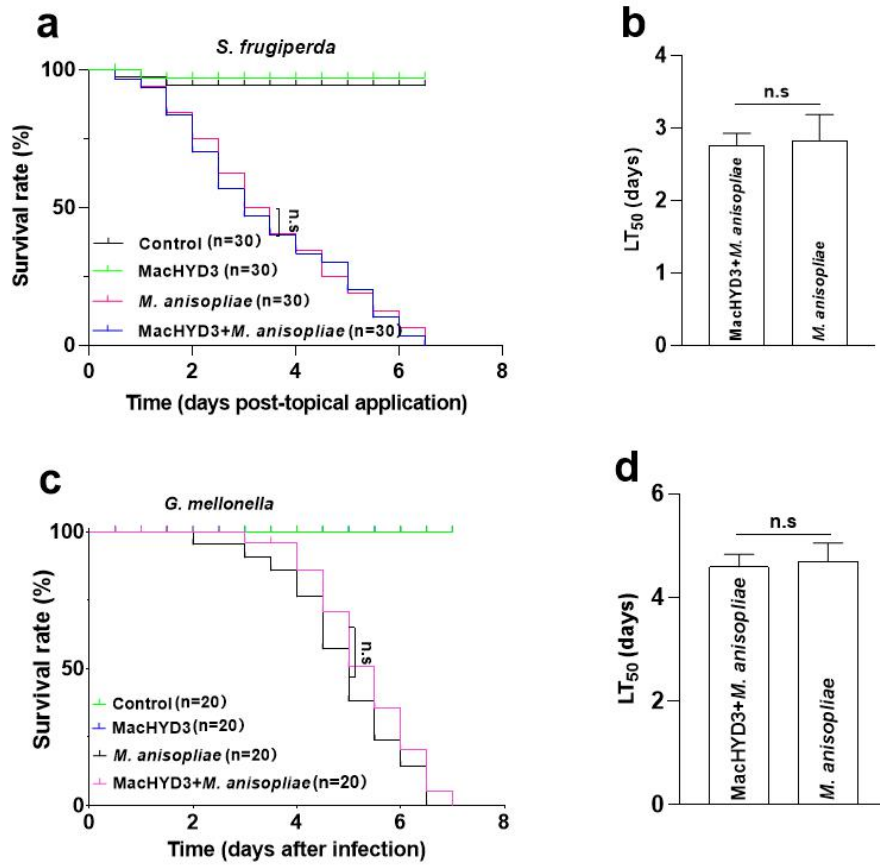

Supplementary Figure 2
